# Supplementary material
Source: Elsevier journal article supplement (https://rcastoragev2.blob.core.windows.net/8296618982a1de28a841287e46dfeef0/mmc1.pdf)
Supplement: mmc1 [file mmc1.pdf]

**Current Biology, Volume 35**

**Supplemental Information**

**Pupillometric signature of implicit learning  
of statistical regularities**

**Paola Binda, Chiara Terzo, Marco Turi, and David C. Burr**

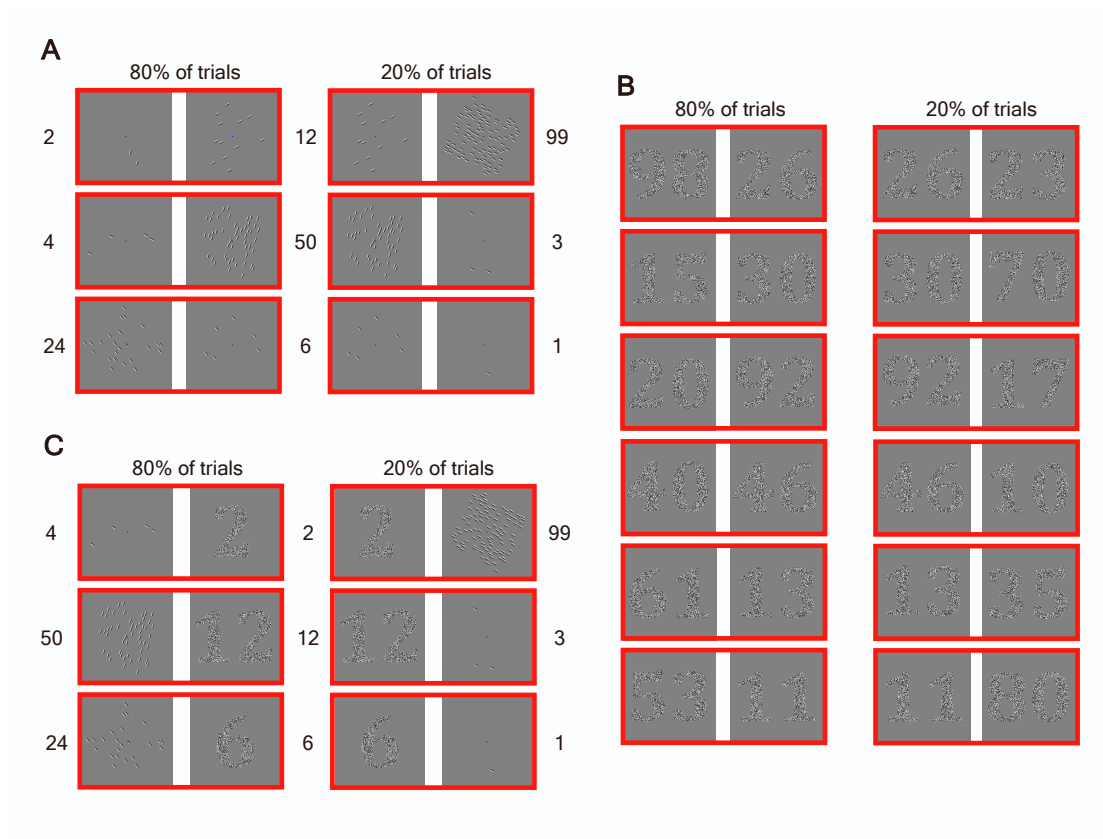

**Figure S1. Stimuli and their pairings. Related to Figure 1 and Figure 4**

Example stimuli used in the three main conditions. **A.** stimuli for the main experiment (arrays). **B.** stimuli for the digit dyads experiments (in a second condition their orientation was jittered by 30 degrees). **C.** stimuli for the digit and arrays condition. In all cases, the red squares highlight the pairings; pairs are shown in two columns, representing frequent (80%) and infrequent (20%) combinations. The latter were introduced to allow for repetitions of the same numerosity or dyad without disrupting the periodic temporal structure of the sequence.

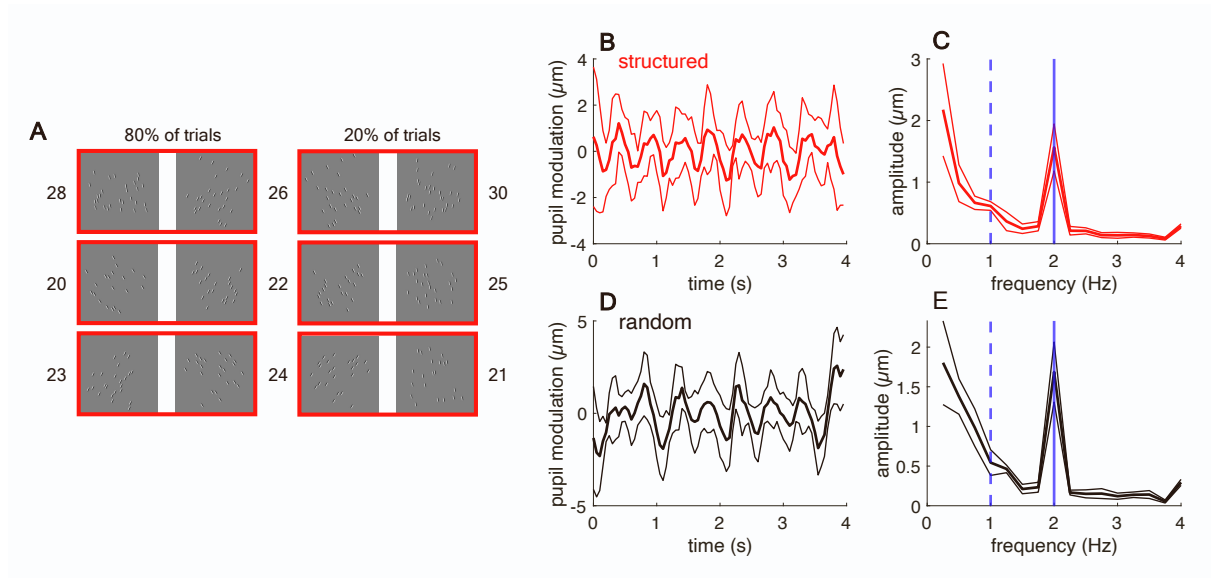

**Figure S2. Control Condition. Related to Figure 2.** Results from a control condition, where array numerosities were hard to discriminate, as panel A shows. **B-E.** pupillometric results presented in the same format as in Figure 2 of the main text. There is no clear response at 1 Hz and pupil traces in the structured and random condition are indistinguishable. Phase coherence analysis showed no significant clustering of the 1 Hz response in the structured condition ( $t(5) = 0.8$ ,  $p = 0.464$ ) or in the random condition ( $t(5) = 0.4$ ,  $p = 0.682$ ) and a non-significant 1 Hz response in the structured condition, log normalized to the random one ( $t(5) = 1.1$ ,  $p = 0.306$ ).
